# Supplementary material for: Prevalence of Escherichia coli ST1193 Causing Intracranial Infection in Changsha, China
Source: MDPI journal article supplement (doi:10.3390/tropicalmed7090217), 2022-08-31
Supplement: s1 [file s1]

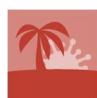

# Supplementary Materials: Prevalence of *Escherichia coli* ST1193 causing intracranial infection in Changsha, China

Table S1. Sequences of primers for PCR amplification and annealing temperature.

| Gene Name                        | Primer   | Primer Sequences (5'–3')           | Primer Size (bp) | Annealing Temperature/°C |
|----------------------------------|----------|------------------------------------|------------------|--------------------------|
| <i>adk</i>                       | Forward  | ATTCTGCTTGCGCTCCGGG                | 583              | 54                       |
|                                  | Reverse  | CCGTCAACTTTCGCGTATTT               |                  |                          |
|                                  | Forward1 | TCATCATCTGCACTTTCCGC               |                  |                          |
|                                  | Reverse1 | CCAGATCAGCGCGAACTTCA               |                  |                          |
| <i>fumC</i>                      | Forward  | TCACAGGTCGCCAGCGCTTC               | 806              | 54                       |
|                                  | Reverse  | GTACGCAGCGAAAAAGATTC               |                  |                          |
|                                  | Reverse1 | TCCCGGCAGATAAGCTGTGG               |                  |                          |
|                                  | Forward  | TCGGCGACACGGATGACGGC               |                  |                          |
| <i>gyrB</i>                      | Reverse  | ATCAGGCCTTCACGCGCATC               | 911              | 60                       |
|                                  | Reverse1 | GTCCATGTAGGCGTTCAGGG               |                  |                          |
|                                  | Forward  | ATGGAAAGTAAAGTAGTTGTTCCGGCAC       |                  |                          |
|                                  | Reverse  | GGACGCAGCAGGATCTGTT                |                  |                          |
| <i>icd</i>                       | Forward  | ATGGAAAGTAAAGTAGTTGTTCCGGCAC       | 878              | 54                       |
|                                  | Reverse  | GGACGCAGCAGGATCTGTT                |                  |                          |
|                                  | Forward  | ATGAAAGTCGCAGTCTCGGCGCTGCTGGCGG    |                  |                          |
|                                  | Reverse  | TTAACGAACTCCTGCCCCAGAGCGATATCTTTCT |                  |                          |
| <i>mdh</i>                       | Forward1 | AGCGCGTTCTGTTCAAATGC               | 816              | 54                       |
|                                  | Reverse1 | CAGGTTTCAGAACTCTCTCTGT             |                  |                          |
|                                  | Forward  | CGCGCTGATGAAAGAGATGA               |                  |                          |
|                                  | Forward1 | TCGGTAACGGTGTGTGCTG                |                  |                          |
| <i>purA</i>                      | Reverse  | CATACGGTAAGCCACGCAGA               | 780              | 58                       |
|                                  | Forward  | CGCATTCGCTTTACCCTGACC              |                  |                          |
|                                  | Reverse  | TCGTGCGAAATCTACGGACCGGA            |                  |                          |
|                                  | Forward1 | ACCTTTGTAGCTGTACCACG               |                  |                          |
| <i>recA</i>                      | Reverse1 | AGCGTGAAGGTAAAACCTGTG              | 288              | 59                       |
|                                  | Forward  | ATGGTACCGGACGAACCAAC               |                  |                          |
|                                  | Reverse  | TGCCGCCAGTACCAAAGACA               |                  |                          |
|                                  | Forward  | CAAACGTGAAGTGTGAGGAG               |                  |                          |
| <i>chuA</i>                      | Reverse  | AATGCGTTCCTCAACCTGTG               | 211              | 59                       |
|                                  | Forward  | CACTATTTCGTAAGGTCATCC              |                  |                          |
|                                  | Reverse  | AGTTTATCGCTGCGGGTCGC               |                  |                          |
|                                  | Forward  | AACGCTATTCGCCAGCTTGC               |                  |                          |
| <i>TspE4.C2</i>                  | Reverse  | TCTCCCCATACCGTACGCTA               | 400              | 59                       |
|                                  | Forward  | GATTCCATCTTGTCAAAATATGCC           |                  |                          |
|                                  | Reverse  | GAAAAAGAAAAAGAATTCCCAAGAG          |                  |                          |
|                                  | Forward  | AGTTTTATGCCCAGTGCGAG               |                  |                          |
| <i>arpA</i>                      | Reverse  | TCTGCGCCGGTCACGCCC                 | 219              | 59                       |
|                                  | Forward  | CGGCGATAAAGACATCTTCAC              |                  |                          |
|                                  | Reverse  | GCAACGCGGCCTGGCGGAAG               |                  |                          |
|                                  | Forward  | AAAAATCACTGCGCCAGTTC               |                  |                          |
| <i>bla<sub>CTX-Mgroup1</sub></i> | Reverse  | AGCTTATTCATCGCCACGTT               | 415              | 52                       |
|                                  | Forward1 | CGTCACGCTGTTGTTAGGAA               |                  |                          |
|                                  | Reverse1 | ACGGCTTTCTGCCTTAGGTT               |                  |                          |
|                                  | Forward  | CGACGCTACCCCTGCTATT                |                  |                          |
| <i>bla<sub>CTX-Mgroup2</sub></i> | Reverse  | CCAGCGTCAGATTTTTTCAGG              | 552              | 52                       |
|                                  | Forward  | TCGCGTTAAGCGGATGATGC               |                  |                          |
|                                  | Reverse  | AACCCACGATGTGGGTAGC                |                  |                          |
|                                  | Forward  | CAAAGAGAGTGCAACGGATG               |                  |                          |
| <i>bla<sub>CTX-Mgroup8</sub></i> | Reverse  | ATTGGAAAGCGTTCATCAC                | 205              | 52                       |
|                                  | Forward1 | TATTGGGAGTTTGAGATGGT               |                  |                          |
|                                  | Reverse1 | TCCTTCAACTCAGCAAAAGT               |                  |                          |
|                                  | Forward  | GCACGATGACATTTCGGG                 |                  |                          |
| <i>bla<sub>CTX-Mgroup9</sub></i> | Reverse  | AACCCACGATGTGGGTAGC                | 327              | 52                       |
|                                  | Forward  | CGACCTTGCGAGAGAAAT                 |                  |                          |
|                                  | Reverse  | GTTCCATCAGCCCTTCAA                 |                  |                          |
|                                  | Forward  | CGATTGCCGCTGAGCCACTT               |                  |                          |
| <i>gyrA</i>                      | Reverse  | CGGAATAAGTTGAGGAATCAG              | 605              | 58                       |
|                                  | Forward  | ATTTCTCACGCCAGGATTTG               |                  |                          |
|                                  | Reverse  | ATTTCTCACGCCAGGATTTG               |                  |                          |
|                                  | Forward  | ATTTCTCACGCCAGGATTTG               |                  |                          |
| <i>parC</i>                      | Reverse  | ATTTCTCACGCCAGGATTTG               | 516              | 53                       |
|                                  | Forward  | ATTTCTCACGCCAGGATTTG               |                  |                          |
|                                  | Reverse  | ATTTCTCACGCCAGGATTTG               |                  |                          |
|                                  | Forward  | ATTTCTCACGCCAGGATTTG               |                  |                          |
| <i>qnrA</i>                      | Reverse  | ATTTCTCACGCCAGGATTTG               | 516              | 53                       |
|                                  | Forward  | ATTTCTCACGCCAGGATTTG               |                  |                          |
|                                  | Reverse  | ATTTCTCACGCCAGGATTTG               |                  |                          |
|                                  | Forward  | ATTTCTCACGCCAGGATTTG               |                  |                          |

---

|                     |         |                         |     |    |
|---------------------|---------|-------------------------|-----|----|
|                     | Reverse | GATCGGCAAAGGTTAGGTCA    |     |    |
| <i>qnrB</i>         | Forward | GATCGTGAAAGCCAGAAAGG    | 476 | 53 |
|                     | Reverse | ATGAGCAACGATGCCTGGTA    |     |    |
| <i>qnrC</i>         | Forward | GGGTTGTACATTTATTGAATCG  | 307 | 53 |
|                     | Reverse | CACCTACCCATTTATTTTCA    |     |    |
| <i>qnrS</i>         | Forward | GCAAGTTCATTGAACAGGGT    | 428 | 53 |
|                     | Reverse | TCTAAACCGTCGAGTTCGGCG   |     |    |
| <i>aac(6)-Ib-cr</i> | Forward | TTGCGATGCTCTATGAGTGGCTA | 482 | 55 |
|                     | Reverse | CTCGAATGCCTGGCGTGTTT    |     |    |
| <i>qepA</i>         | Forward | AACTGCTTGAGCCCGTAGAT    | 596 | 55 |
|                     | Reverse | GTCTACGCCATGGACCTCAC    |     |    |

---
